# Supplementary material for: Classification of Parkinson’s disease and its stages using machine learning
Source: Springer Nature journal article supplement (doi:10.1038/s41598-022-18015-z), 2022-08-18
Supplement: 41598_2022_18015_MOESM1_ESM.pdf [file 41598_2022_18015_MOESM1_ESM.pdf]

## Appendix

| Assessment / Questionnaire | Feature                                           | Value        | Gini  |
|----------------------------|---------------------------------------------------|--------------|-------|
| General Questionnaire      | Root Feature<br><i>Handwriting Problems</i>       | $x \leq 0.5$ | 0.404 |
|                            | First Order Feature(s)<br><i>Energy Level</i>     | $x \leq 8.5$ | 0.492 |
| PDQ - 39                   | Root Feature<br><i>Difficulty Writing Clearly</i> | $x \leq 1.5$ | 0.404 |
|                            | First Order Feature(s)<br><i>Fear of Falling</i>  | $x \leq 1.5$ | 0.059 |

**Appendix Table 1.** Features of Interest given Decision Tree Results for Patient Reported Outcomes - Gini Index Values of Questionnaire Responses for PD Population versus Controls.

| <b>Assessment</b>                                           | <b>Feature</b>                            | <b>Value</b>     | <b>Gini</b> |
|-------------------------------------------------------------|-------------------------------------------|------------------|-------------|
| Finger Tapping<br>(Fine Motor)                              | Root Feature                              |                  |             |
|                                                             | <i>Minimum Magnitude of Acceleration</i>  | $x \leq 0.871$   | 0.375       |
|                                                             | First Order Feature(s)                    |                  |             |
|                                                             | <i>Total Small Circles Tapped</i>         | $x \leq 35.5$    | 0.208       |
| Grandfather Passage<br>(Speech)                             | Root Feature                              |                  |             |
|                                                             | <i>Number of Missed Words</i>             | $x \leq 22.5$    | 0.423       |
|                                                             | First Order Feature(s)                    |                  |             |
|                                                             | <i>Maximum Magnitude of Acceleration</i>  | $x \leq 1.001$   | 0.165       |
|                                                             | <i>Number of Additional Words</i>         | $x \leq 17.5$    | 0.202       |
| Circle Tracing<br>(Fine-Motor)                              | Root Feature                              |                  |             |
|                                                             | <i>Maximum Drawing Speed</i>              | $x \leq 388.85$  | 0.435       |
|                                                             | First Order Feature(s)                    |                  |             |
|                                                             | <i>Minimum Magnitude of Acceleration</i>  | $x \leq 0.998$   | 0.32        |
| Square Tracing<br>(Fine-Motor)                              | Root Feature                              |                  |             |
|                                                             | <i>Maximum Drawing Speed</i>              | $x \leq 454.433$ | 0.44        |
|                                                             | First Order Feature(s)                    |                  |             |
|                                                             | <i>Minimum Magnitude of Acceleration</i>  | $x \leq 0.997$   | 0.387       |
| Narration<br>(Speech)                                       | Root Feature                              |                  |             |
|                                                             | <i>Phrase Said Incorrectly</i>            | $x \leq 0.5$     | 0.44        |
|                                                             | First Order Feature(s)                    |                  |             |
|                                                             | <i>Time from Start to First Word Said</i> | $x \leq 2.569$   | 0.251       |
|                                                             | <i>Avg Time between Words Said</i>        | $x \leq 0.324$   | 0.278       |
| Object Naming<br>(Speech)                                   | Root Feature                              |                  |             |
|                                                             | <i>Total Incorrect</i>                    | $x \leq 2.5$     | 0.44        |
|                                                             | First Order Feature(s)                    |                  |             |
|                                                             | <i>Minimum Magnitude of Acceleration</i>  | $x \leq 1.003$   | 0.08        |
|                                                             | <i>Maximum Magnitude of Acceleration</i>  | $x \leq 1.102$   | 0.463       |
| Card Matching<br>(Memory)                                   | Root Feature                              |                  |             |
|                                                             | <i>Minimum Magnitude of Acceleration</i>  | $x \leq 0.953$   | 0.44        |
|                                                             | First Order Feature(s)                    |                  |             |
|                                                             | <i>Maximum Magnitude of Acceleration</i>  | $x \leq 1.243$   | 0.301       |
| Card Matching<br>with Cognitive<br>Interference<br>(Memory) | Root Feature                              |                  |             |
|                                                             | <i>Maximum Magnitude of Acceleration</i>  | $x \leq 1.135$   | 0.44        |
|                                                             | First Order Feature(s)                    |                  |             |
|                                                             | <i>Maximum Magnitude of Acceleration</i>  | $x \leq 1.048$   | 0.434       |

**Appendix Table 2.** Features of Interest given Decision Tree Results for Single Functional Tests - Gini Index Values of Functional Neurocognitive Assessment Tests for PD Population versus Controls.

| <b>Assessment</b>                                                      | <b>Feature</b>                           | <b>Value</b>      | <b>Gini</b> |
|------------------------------------------------------------------------|------------------------------------------|-------------------|-------------|
| Circle Tracing<br>with Speech<br>(Multit-Test)                         | Root Feature                             |                   |             |
|                                                                        | <i>Maximum Magnitude of Acceleration</i> | $x \leq 1.079$    | 0.429       |
|                                                                        | First Order Feature(s)                   |                   |             |
|                                                                        | <i>Minimum Magnitude of Acceleration</i> | $x \leq 0.924$    | 0.444       |
|                                                                        | <i>Total Distance Drawn</i>              | $x \leq 25268.62$ | 0.137       |
| Square Tracing<br>with Speech<br>(Multit-Test)                         | Root Feature                             |                   |             |
|                                                                        | <i>Maximum Magnitude of Acceleration</i> | $x \leq 1.074$    | 0.429       |
|                                                                        | First Order Feature(s)                   |                   |             |
|                                                                        | <i>Maximum Time between Words Said</i>   | $x \leq 2.897$    | 0.444       |
|                                                                        | <i>Number of Outline Crossings</i>       | $x \leq 19.0$     | 0.137       |
| Narration Writer<br>(Multit-Test)                                      | Root Feature                             |                   |             |
|                                                                        | <i>Minimum Magnitude of Acceleration</i> | $x \leq 0.919$    | 0.44        |
|                                                                        | First Order Feature(s)                   |                   |             |
|                                                                        | <i>Average Magnitude of Acceleration</i> | $x \leq 1.003$    | 0.313       |
|                                                                        | <i>Total Elapsed Writing Time</i>        | $x \leq 27.251$   | 0.32        |
| Stroop Word Color<br>(Executive Function)                              | Root Feature                             |                   |             |
|                                                                        | <i>Minimum Magnitude of Acceleration</i> | $x \leq 1.002$    | 0.44        |
|                                                                        | First Order Feature(s)                   |                   |             |
|                                                                        | <i>Total Colors Generated</i>            | $x \leq 8.5$      | 0.369       |
| Visuospatial<br>(Executive Function)                                   | Root Feature                             |                   |             |
|                                                                        | <i>Average Drawing Speed</i>             | $x \leq 218.442$  | 0.458       |
|                                                                        | First Order Feature(s)                   |                   |             |
|                                                                        | <i>Minimum Magnitude of Acceleration</i> | $x \leq 1.002$    | 0.305       |
|                                                                        | <i>Time</i>                              | $x \leq 8.456$    | 0.355       |
| Visuospatial<br>with Cognitive<br>Interference<br>(Executive Function) | Root Feature                             |                   |             |
|                                                                        | <i>Average Drawing Speed</i>             | $x \leq 186.201$  | 0.458       |
|                                                                        | First Order Feature(s)                   |                   |             |
|                                                                        | <i>Average Distance to Correct Point</i> | $x \leq 10.351$   | 0.342       |
|                                                                        | <i>Maximum Time Between Objects</i>      | $x \leq 1.933$    | 0.426       |

**Appendix Table 3.** Features of Interest given Decision Tree Results for Multifunctional Tests - Gini Index Values of Functional Neurocognitive Assessment Tests for PD Population versus Controls.

| <b>Assessment / Questionnaire</b> | <b>Feature</b>                                              | <b>Value</b>   | <b>Gini</b> |
|-----------------------------------|-------------------------------------------------------------|----------------|-------------|
| General Questionnaire             | Root Feature<br><i>Handwriting Problems</i>                 | $x \leq 0.5$   | 0.404       |
|                                   | First Order Feature(s)<br><i>Energy Level</i>               | $x \leq 8.5$   | 0.492       |
| PDQ - 39                          | Root Feature<br><i>Difficulty with Leisure Activities</i>   | $x \leq 2.5$   | 0.412       |
|                                   | First Order Feature(s)<br><i>Felt Unable to Communicate</i> | $x \leq 0.5$   | 0.219       |
|                                   | <i>Felt Unpleasantly Hot or Cold</i>                        | $x \leq 0.5$   | 0.245       |
| Berg Balance Scale                | Root Feature<br><i>Standing With One Foot In Front</i>      | $x \leq 2.5$   | 0.412       |
|                                   | First Order Feature(s)<br><i>Turning to Look Behind</i>     | $x \leq 3.5$   | 0.413       |
| Functional Movement Assessments   | Root Feature<br><i>Six Minute Walk</i>                      | $x \leq 494.5$ | 0.412       |
|                                   | First Order Feature(s)<br><i>Timed Up and Go</i>            | $x \leq 9.305$ | 0.397       |

**Appendix Table 4.** Features of Interest given Decision Tree Results of Patient Reported Outcomes/Subjective Assessment - Gini Index Values of Functional Assessments and Questionnaire Responses for PD Populations in Early Stages (H&Y Stages 1 and 2) versus Advanced Stages (H&Y Stages 3, 4, and 5).

| <b>Assessment</b>                                           | <b>Feature</b>                             | <b>Value</b>     | <b>Gini</b> |
|-------------------------------------------------------------|--------------------------------------------|------------------|-------------|
| Finger Tapping<br>(Fine Motor)                              | Root Feature                               |                  |             |
|                                                             | <i>Total Targets Tapped</i>                | $x \leq 32.5$    | 0.363       |
|                                                             | First Order Feature(s)                     |                  |             |
|                                                             | <i>Maximum Magnitude of Acceleration</i>   | $x \leq 1.1937$  | 0.198       |
| Circle Tracing<br>(Fine-Motor)                              | Root Feature                               |                  |             |
|                                                             | <i>First and Last Point Distance</i>       | $x \leq 74.77$   | 0.363       |
|                                                             | First Order Feature(s)                     |                  |             |
|                                                             | <i>Average Drawing Speed</i>               | $x \leq 251.92$  | 0.208       |
|                                                             | <i>First and Last Point Distance</i>       | $x \leq 182.21$  | 0.375       |
| Square Tracing<br>(Fine-Motor)                              | Root Feature                               |                  |             |
|                                                             | <i>Minimum Magnitude of Acceleration</i>   | $x \leq 0.907$   | 0.363       |
|                                                             | First Order Feature(s)                     |                  |             |
|                                                             | <i>Maximum Drawing Speed</i>               | $x \leq 1327.25$ | 0.496       |
| Narration<br>(Speech)                                       | Root Feature                               |                  |             |
|                                                             | <i>Total Elapsed Speaking Time</i>         | $x \leq 5.948$   | 0.363       |
|                                                             | First Order Feature(s)                     |                  |             |
|                                                             | <i>Time from Start to First Word Said</i>  | $x \leq 3.689$   | 0.5         |
| Object Naming<br>(Speech)                                   | Root Feature                               |                  |             |
|                                                             | <i>Total Correct Objects</i>               | $x \leq 10.5$    | 0.363       |
|                                                             | First Order Feature(s)                     |                  |             |
|                                                             | <i>Total Incorrect Objects</i>             | $x \leq 1.5$     | 0.124       |
|                                                             | <i>Average Time for Correct Response</i>   | $x \leq 2.52$    | 0.444       |
| Card Matching<br>(Memory)                                   | Root Feature                               |                  |             |
|                                                             | <i>Average Time Between Non-Match Pair</i> | $x \leq 1.98$    | 0.363       |
|                                                             | First Order Feature(s)                     |                  |             |
|                                                             | <i>Maximum Magnitude of Acceleration</i>   | $x \leq 1.372$   | 0.198       |
| Card Matching<br>with Cognitive<br>Interference<br>(Memory) | Root Feature                               |                  |             |
|                                                             | <i>Average Time Between Non-Match Pair</i> | $x \leq 2.377$   | 0.363       |
|                                                             | First Order Feature(s)                     |                  |             |
|                                                             | <i>Average Time Between Non-Match Pair</i> | $x \leq 0.949$   | 0.198       |
| Grandfather Passage<br>(Speech)                             | Root Feature                               |                  |             |
|                                                             | <i>Maximum Magnitude of Acceleration</i>   | $x \leq 1.325$   | 0.423       |
|                                                             | First Order Feature(s)                     |                  |             |
|                                                             | <i>Average Time between Words Said</i>     | $x \leq 0.584$   | 0.32        |

**Appendix Table 5.** Features of Interest given Decision Tree Results for Single Functional Tests - Gini Index Values of Functional Neurocognitive Assessment Tests for PD Population versus Controls.

| <b>Assessment</b>                                                      | <b>Feature</b>                                                      | <b>Value</b>     | <b>Gini</b> |
|------------------------------------------------------------------------|---------------------------------------------------------------------|------------------|-------------|
| Circle Tracing<br>with Speech<br>(Multit-Test)                         | Root Feature<br><i>Number of Missing Months</i>                     | $x \leq 2.5$     | 0.363       |
|                                                                        | First Order Feature(s)<br><i>Average Distance from Shape</i>        | $x \leq 8.465$   | 0.408       |
| Square Tracing<br>with Speech<br>(Multit-Test)                         | Root Feature<br><i>Number of Missing Months</i>                     | $x \leq 2.5$     | 0.363       |
|                                                                        | First Order Feature(s)<br><i>Maximum Magnitude of Acceleration</i>  | $x \leq 1.104$   | 0.469       |
| Narration Writer<br>(Multit-Test)                                      | Root Feature<br><i>Average Time Between Strokes</i>                 | $x \leq 0.314$   | 0.363       |
|                                                                        | First Order Feature(s)<br><i>Time from Start to First Word Said</i> | $x \leq 7.14$    | 0.494       |
| Stroop Word Color<br>(Executive Function)                              | Root Feature<br><i>Total Colors Generated</i>                       | $x \leq 6.5$     | 0.363       |
|                                                                        | First Order Feature(s)<br><i>Average Time for Correct Response</i>  | $x \leq 1.921$   | 0.124       |
|                                                                        | <i>Average Time for Incorrect Response</i>                          | $x \leq 19.569$  | 0.444       |
| Visuospatial<br>(Executive Function)                                   | Root Feature<br><i>Total Distance Drawn</i>                         | $x \leq 3529.34$ | 0.375       |
|                                                                        | First Order Feature(s)<br><i>Total Distance Drawn</i>               | $x \leq 2214.88$ | 0.117       |
| Visuospatial<br>with Cognitive<br>Interference<br>(Executive Function) | Root Feature<br><i>Average Distance from Correct Path</i>           | $x \leq 13.332$  | 0.375       |
|                                                                        | First Order Feature(s)<br><i>Time</i>                               | $x \leq 17.493$  | 0.278       |

**Appendix Table 6.** Features of Interest given Decision Tree Results for Multifunctional Tests - Gini Index Values of Functional Neurocognitive Assessment Tests for PD Population versus Controls.
